# Supplementary material
Source: PubMed Central journal article supplement (PMC2898892)
Supplement: NIHMS199832-supplement-1.pdf [file NIHMS199832-supplement-1.pdf]

## **SUPPLEMENTARY TEXT**

### **Differential roles of endocardial and myocardial Brg1 in heart development**

We previously reported that *Tie2cre;Brg1<sup>F/F</sup>* embryos that lacked endocardial *Brg1* had defects in the patterning of trabeculi<sup>1</sup>. In contrast, *Sm22 $\alpha$ Cre;Brg1<sup>F/F</sup>* embryos that lacked myocardial *Brg1* had normal trabecular patterning at E10.5<sup>1</sup> and E11.5 (Supplementary Fig. 3a-f). By alcian blue staining<sup>1</sup>, these embryos did not have changes of extracellular matrix as observed in *Tie2cre;Brg1<sup>F/F</sup>* mice (Supplementary Fig. 4b). Therefore, the thin compact myocardium phenotypes of *Sm22 $\alpha$ Cre;Brg1<sup>F/F</sup>* embryos are distinct from the trabecular patterning defects of *Tie2cre;Brg1<sup>F/F</sup>* embryos. Furthermore, the molecular pathways controlled by myocardial Brg1 (current studies) are different from that (*Adamts1*) controlled by endocardial Brg1<sup>1</sup>. Thus, our observations indicate that the trabecular patterning and compact myocardium formation in early embryos are two different developmental processes regulated separately by endocardial and myocardial Brg1.

### **The J1 anti-Brg1 antibody immunoprecipitates Brg1 on *MHC* promoters**

Although the J1 anti-Brg1 antibody was reported to have some cross-reactivity with the closely related Brahma ATPase (*Brm*) when *Brm* was overexpressed<sup>2</sup>, we did not observe such cross-reactivity in the immunostaining of paraffin sections of embryonic hearts. J1 specifically recognized Brg1 in embryonic hearts despite the presence of *Brm* proteins there

(Supplementary Fig. 2b,c; data not shown). To conclude that Brg1 binds to the *MHC* promoters, we first performed J1-ChIP analysis using mice that lack *Brm*<sup>3</sup>. In the hearts of *Brm*-null mice that underwent TAC 2 weeks before, we found that the J1 antibody immunoprecipitated the BAF complex on both the  $\alpha$ -*MHC* and  $\beta$ -*MHC* promoters (Supplementary Fig. 10f) in a pattern similar to that of the TAC'ed control mice (Fig. 4f). Since *Brm*-null mice have only minimal amount of truncated Brm proteins<sup>2</sup>, these J1-ChIP results suggest that Brg1, indeed, binds to the  $\alpha$ -*MHC* and  $\beta$ -*MHC* promoters. Conversely, we used J1 to perform ChIP analysis of normal non-stressed adult hearts that predominantly express Brm with undetectable Brg1 proteins in cardiomyocytes (Fig. 4c; data not shown). This J1-ChIP analysis showed no binding of proteins to either  $\alpha$ -*MHC* or  $\beta$ -*MHC* promoters (Supplementary Fig. 10e), indicating J1 does not immunoprecipitate Brm proteins on the *MHC* promoters. These results are consistent with the reporter assays that showed Brg1 restoration alone in SW13 cells (which lack both Brg1 and Brm) was sufficient to repress  $\alpha$ -*MHC* and activates  $\beta$ -*MHC* promoters (Fig. 2f,i). Together, these observations indicate that the J1 antibody detects Brg1 on the *MHC* promoters.

## **SUPPLEMENTARY FIGURE LEGENDS**

**Supplementary Figure 1. Dynamic changes of *MHC* gene expression under different pathophysiological conditions.** Embryonic cardiomyocytes are highly proliferative and

express primarily  $\beta$ -MHC. Adult cardiomyocytes are post-mitotic and mainly express  $\alpha$ -MHC. Under stress conditions, adult cardiomyocytes undergo hypertrophy and a shift from adult  $\alpha$ -MHC to embryonic  $\beta$ -MHC isoforms.

**Supplementary Figure 2. Embryos lacking myocardial *Brg1* die at E11.5-E12.5.**

- a, Whole mount  $\beta$ -galactosidase staining of *Sm22 $\alpha$ Cre;R26R* embryos.
- b, c, Immunostaining of Brg1 (red, J1 antibody) and Troponin T (green) of E9.5 control and *Sm22 $\alpha$ Cre;Brg1<sup>F/F</sup>* embryos, showing specific deletion of Brg1 in myocardial cells. Nuclei: blue by DAPI staining. Short arrows: endocardial cells. Long arrows: myocardial cells.
- d, e, Control and mutant (*Sm22 $\alpha$ Cre;Brg1<sup>F/F</sup>*) embryos whole mount at E11.5. The left upper limb was removed to expose the heart.
- f, The frequency of recovering mutant embryos at different gestational dates.

**Supplementary Figure 3. *Sm22 $\alpha$ Cre;Brg1<sup>F/F</sup>* embryonic myocardium fails to proliferate.**

- a, b, H&E sections of E10.5 embryos. Arrows: interventricular septum. Asterisks: endocardial cushion.
- c, Quantitation of compact myocardial thickness. p-value: Student-t test. Error bars: standard deviation.
- d, e, H&E sections of E11.5 embryos. Arrows: interventricular septum. Asterisks: endocardial

cushion.

**f**, Quantitation of trabecular myocardium. p-value: Student-t test. Error bars: standard deviation.

**g-j**, TUNEL staining of E10.5 and E11.5 wildtype and *Sm22 $\alpha$ Cre;Brg1<sup>F/F</sup>* embryos.

**k, l**, Activated caspase 3 immunostaining E11.5 embryos. Green: auto fluorescence from red blood cells.

**m, n**, BrdU immunostaining E10.5 embryos in the septal primordia.

**o**, Quantification of BrdU incorporation of endocardium, endocardial cushion, and epicardium of control (black bar) and *Sm22 $\alpha$ Cre;Brg1<sup>F/F</sup>* (gray bar) embryonic hearts.

**Supplementary Figure 4. *Sm22 $\alpha$ Cre;Brg1<sup>F/F</sup>* embryos have normal cardiac jelly and vascular pattern at E11.5.**

**a, b**, Alcian blue staining<sup>1</sup> of control (**a**) and *Sm22 $\alpha$ Cre;Brg1<sup>F/F</sup>* (**b**) embryos at E11.5. arrow: extracellular matrix in cardiac jelly.

**c, d**, Whole mount Pecam1 immunostaining (brown) of cranial vessels (arrows) in control (**c**) and *Sm22 $\alpha$ Cre;Brg1<sup>F/F</sup>* (**d**) embryos at E11.5.

**e, f**, Whole mount Pecam1 immunostaining (brown) of intersomitic vessels (arrows) in control (**e**) and *Sm22 $\alpha$ Cre;Brg1<sup>F/F</sup>* (**f**) embryos at E11.5.

**Supplementary Figure 5. *Sm22 $\alpha$ Cre;Brg1<sup>F/F</sup>* embryos have normal expression of many**

**genes.**

RNA *in-situ* hybridization of E11.5 control and *Sm22 $\alpha$ Cre;Brg1<sup>F/F</sup>* hearts. Expression of these transcripts are comparable in amount and localization between control and mutants.

**Supplementary Figure 6. *Sm22 $\alpha$ Cre;Brg1<sup>F/F</sup>* mutants have ectopic expression of p57<sup>kip2</sup>.**

**a**, Quantitation of wildtype BrdU incorporation and p57<sup>kip2</sup> expression, which show inverse correlation with each other.

**b**, p57<sup>kip2</sup> immunostaining of E10.5 control and *Sm22 $\alpha$ Cre;Brg1<sup>F/F</sup>* hearts. Asterisks: septal primordium.

**c**, Gross morphology of cultured embryos.

**Supplementary Figure 7. Regulation of BMP10, p57<sup>kip2</sup> and myocardial proliferation by Brg1 in the myocardium.**

**a, b**, Brg1 immunostaining of E10.5 wildtype and *Mef2cCre;Brg1<sup>F/F</sup>* hearts at E10.5.

Asterisks: endocardium. Arrows: right ventricular myocardium. Arrowheads: left ventricular myocardium. RV: right ventricle. LV: left ventricle.

**c, d**, RNA *in situ* hybridization of *BMP10* in E10.5 control and *Mef2cCre;Brg1<sup>F/F</sup>* embryos.

Arrows: right ventricular myocardium. Arrowheads: left ventricular myocardium.

**e, f**, p57<sup>kip2</sup> immunostaining of E10.5 embryos. Asterisks: endocardium. Arrows: right

ventricular myocardium. Arrowheads: left ventricular myocardium.

**g, h**, BrdU immunostaining of E10.5 embryos. Asterisks: endocardium. Arrows: right ventricular myocardium. Arrowheads: left ventricular myocardium.

**i, j**, H&E sections of control (**i**) and *Mef2cCre;Brg1<sup>F/F</sup>* (**j**) hearts at E10.5. The cardiac outflow tract (OFT) of *Mef2cCre;Brg1<sup>F/F</sup>* embryos is hypoplastic.

**Supplementary Figure 8. *BMP10* and *MHC* promoter analysis.**

**a**, Sequence alignment of the *BMP10* locus from mouse, human, and rat. Height of individual peaks indicates degree of sequence homology. Black boxes (p1-p4) are regions of high sequence homology and further analyzed by ChIP. Red: promoter elements. Blue: exons. Green: transposons and repeat elements. Yellow: untranslated regions.

**b, c**, PCR analysis of Brg1-immunoprecipitated chromatin from E11.5 hearts (**b**) and adult hearts 2 weeks after the TAC procedure (**c**).  $\alpha$ -HRP: anti-horse radish peroxidase antibody for negative control.

**d**, Deletional analyses of the  $\alpha$ -*MHC* promoter in luciferase reporter assays in SW13 cells. p-value: Student t test. Error bar: standard deviation.

**e**, Deletional analyses of the  $\beta$ -*MHC* promoter in luciferase reporter assays in SW13 cells. p-value: Student t test. Error bar: standard deviation.

**Supplementary Figure 9. Brg1 commands parallel pathways to regulate myocardial proliferation and differentiation.**

**a, b**,  $\alpha$ -actinin immunostaining (green) of E9.5 control (**a**) and *Sm22 $\alpha$ Cre;Brg1<sup>F/F</sup>* (**b**) embryos. Nuclei: blue (Dapi staining). Arrowheads point to dotted  $\alpha$ -actinin proteins in (**a**).

Arrows points to  $\alpha$ -actinin in a thread-like, striated pattern (**b**).

**c, d**, Gross morphology of cultured embryos.

**d, f**, BrdU immunostaining of cultured embryos treated with DMSO and TSA.

**g**, BrdU incorporation quantitation in myocardial cells of cultured embryos. p-value: Student-t test.

**h, i**, Quantitative RT-PCR analysis of ventricular  $\alpha$ -MHC and  $\beta$ -MHC mRNA (**h**) and  $\alpha$ -MHC/ $\beta$ -MHC ratio (**i**) in cultured embryos treated with BSA or BMP10. Ctrl: control embryos. Mut: *Sm22 $\alpha$ Cre;Brg1<sup>F/F</sup>* embryos.

**Supplementary Figure 10. Brg1 is required for cardiac hypertrophy, fibrosis, and MHC switch in adult mice.**

**a**, Section of a whole mount  $\beta$ -galactosidase stained (blue) heart of *Tnnt2-rtTA;Tre-Cre;Rosa26LacZ* mice treated with doxycycline for 5 days.

**b**, Cardiac ventricular weight/body weight ratio. p-value: Student-t test.

**c, d**, Trichrome staining of doxycycline-treated control and *Tnnt2-rtTA;Tre-Cre;Brg1<sup>F/F</sup>* mice

after the TAC procedure. Black: nuclei, red: cardiomyocytes, blue: fibrotic areas.

**e**, PCR analysis of Brg1-immunoprecipitated chromatin from wildtype adult hearts in mice that received sham operation. a1-a7, b1-b5: primers targeting conserved regions of the  $\alpha$ -*MHC* and  $\beta$ -*MHC* promoter, respectively.

**f**, PCR analysis of J1-immunoprecipitated chromatin from *Brm*-null adult hearts in mice that received TAC operation 2 weeks before. a1-a7, b1-b5: primers targeting conserved regions of the  $\alpha$ -*MHC* and  $\beta$ -*MHC* promoter, respectively.

**Supplementary Figure 11. ChIP analysis, expression and co-immunoprecipitation of PARP1 and HDAC.**

**a**, PCR analysis of PARP1-immunoprecipitated chromatin from adult hearts 2 weeks after TAC. Numbers (p1-p4) indicate conserved regions of the *BMP10* promoter illustrated in Supplementary Fig. 8a.

**b**, Immunostaining and quantitation of myocardial BrdU incorporation in embryos cultured with BrdU from E9.5 to E10.5 in the presence or absence of PJ34.

**c**, PCR analysis of PARP1-immunoprecipitated chromatin from E11.5 hearts.

**d**, PARP1 (Green) immunostaining of E11.5 embryonic heart. Asterisks: myocardial cells.

**e**, Co-immunoprecipitation of PARP1 and HDAC2 from adult myocardium.

**f**, PCR analysis of HDAC9-immunoprecipitated chromatin from adult hearts two weeks after



TAC. IgG: negative control antibody. Numbers (a1-a7) and (b1-b5) indicate conserved regions of  $\alpha$ -MHC and  $\beta$ -MHC promoter.

**Supplementary Figure 12. Characteristics of human hypertrophic cardiomyopathy.**

**a**, Demographic data of control subjects and patients with hypertrophic cardiomyopathy (HCM). IVSd is measured by cardiac magnetic resonance imaging.

**b**, Cardiac magnetic resonance imaging (MRI) of a normal subject and a HCM patient listed in **(a)**. The arrows denote the thickness of interventricular septum measured during diastole (IVSd). LV, RV: left, right ventricle. LA, RA: left, right atrium.

**c**, Myocardial thickness (IVSd) in normal and HCM subjects. p-value: Student-t test. Error bar: standard deviation.

**d**, Mathematical derivation of the inflection point of the regression curve described in Fig. 5b.

**e**, Mathematical derivation of the inflection point of the regression curve described in Fig. 5c.

**References:**

1. Stankunas, K. et al. Endocardial Brg1 represses ADAMTS1 to maintain the microenvironment for myocardial morphogenesis. *Dev Cell* 14, 298-311 (2008).
2. Muchardt, C., Reyes, J. C., Bourachot, B., Leguoy, E. & Yaniv, M. The hbrm and BRG-1 proteins, components of the human SNF/SWI complex, are phosphorylated and excluded from the condensed chromosomes during mitosis. *Embo J* 15, 3394-402 (1996).
3. Reyes, J. C. et al. Altered control of cellular proliferation in the absence of mammalian brahma (SNF2alpha). *Embo J* 17, 6979-91 (1998).
