# Supplementary material
Source: PubMed Central journal article supplement (PMC2898892)
Supplement: NIHMS199832-supplement-2.pdf [file NIHMS199832-supplement-2.pdf]

Myosin Heavy Chain (MHC) expression changes under different pathophysiological conditions

**a**

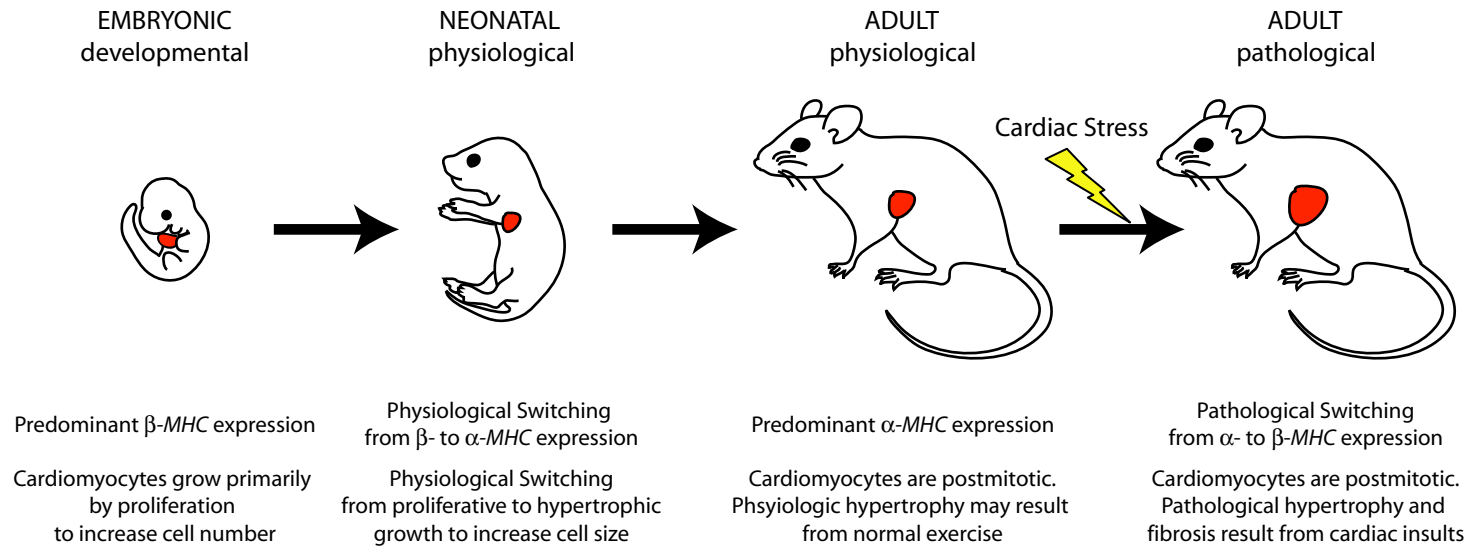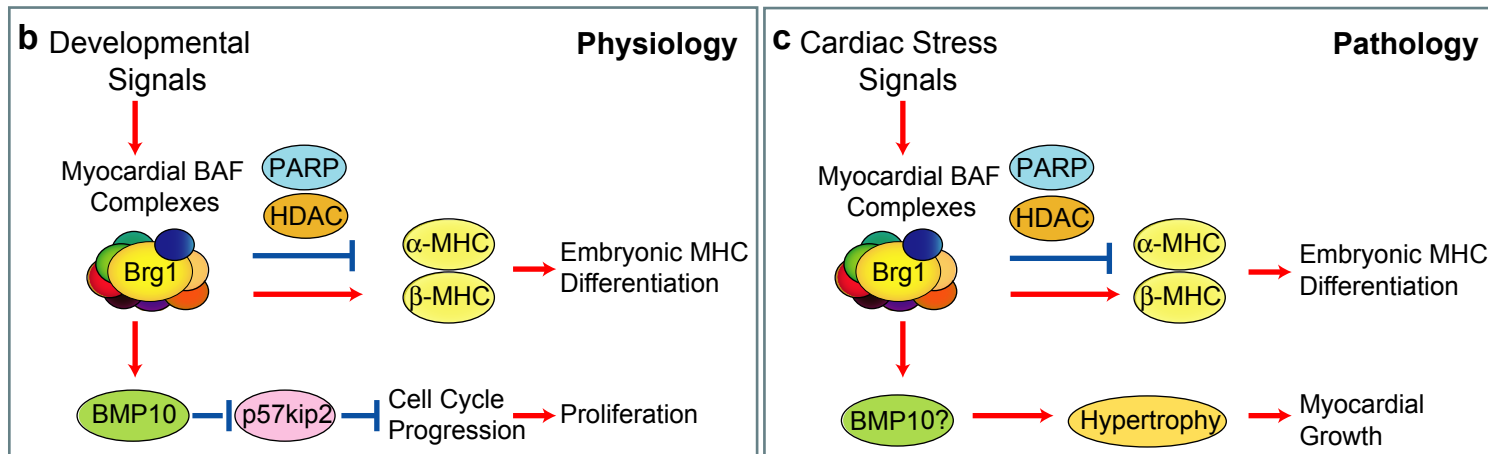

## Embryos lacking myocardial Brg1 die at E11.5-E12.5

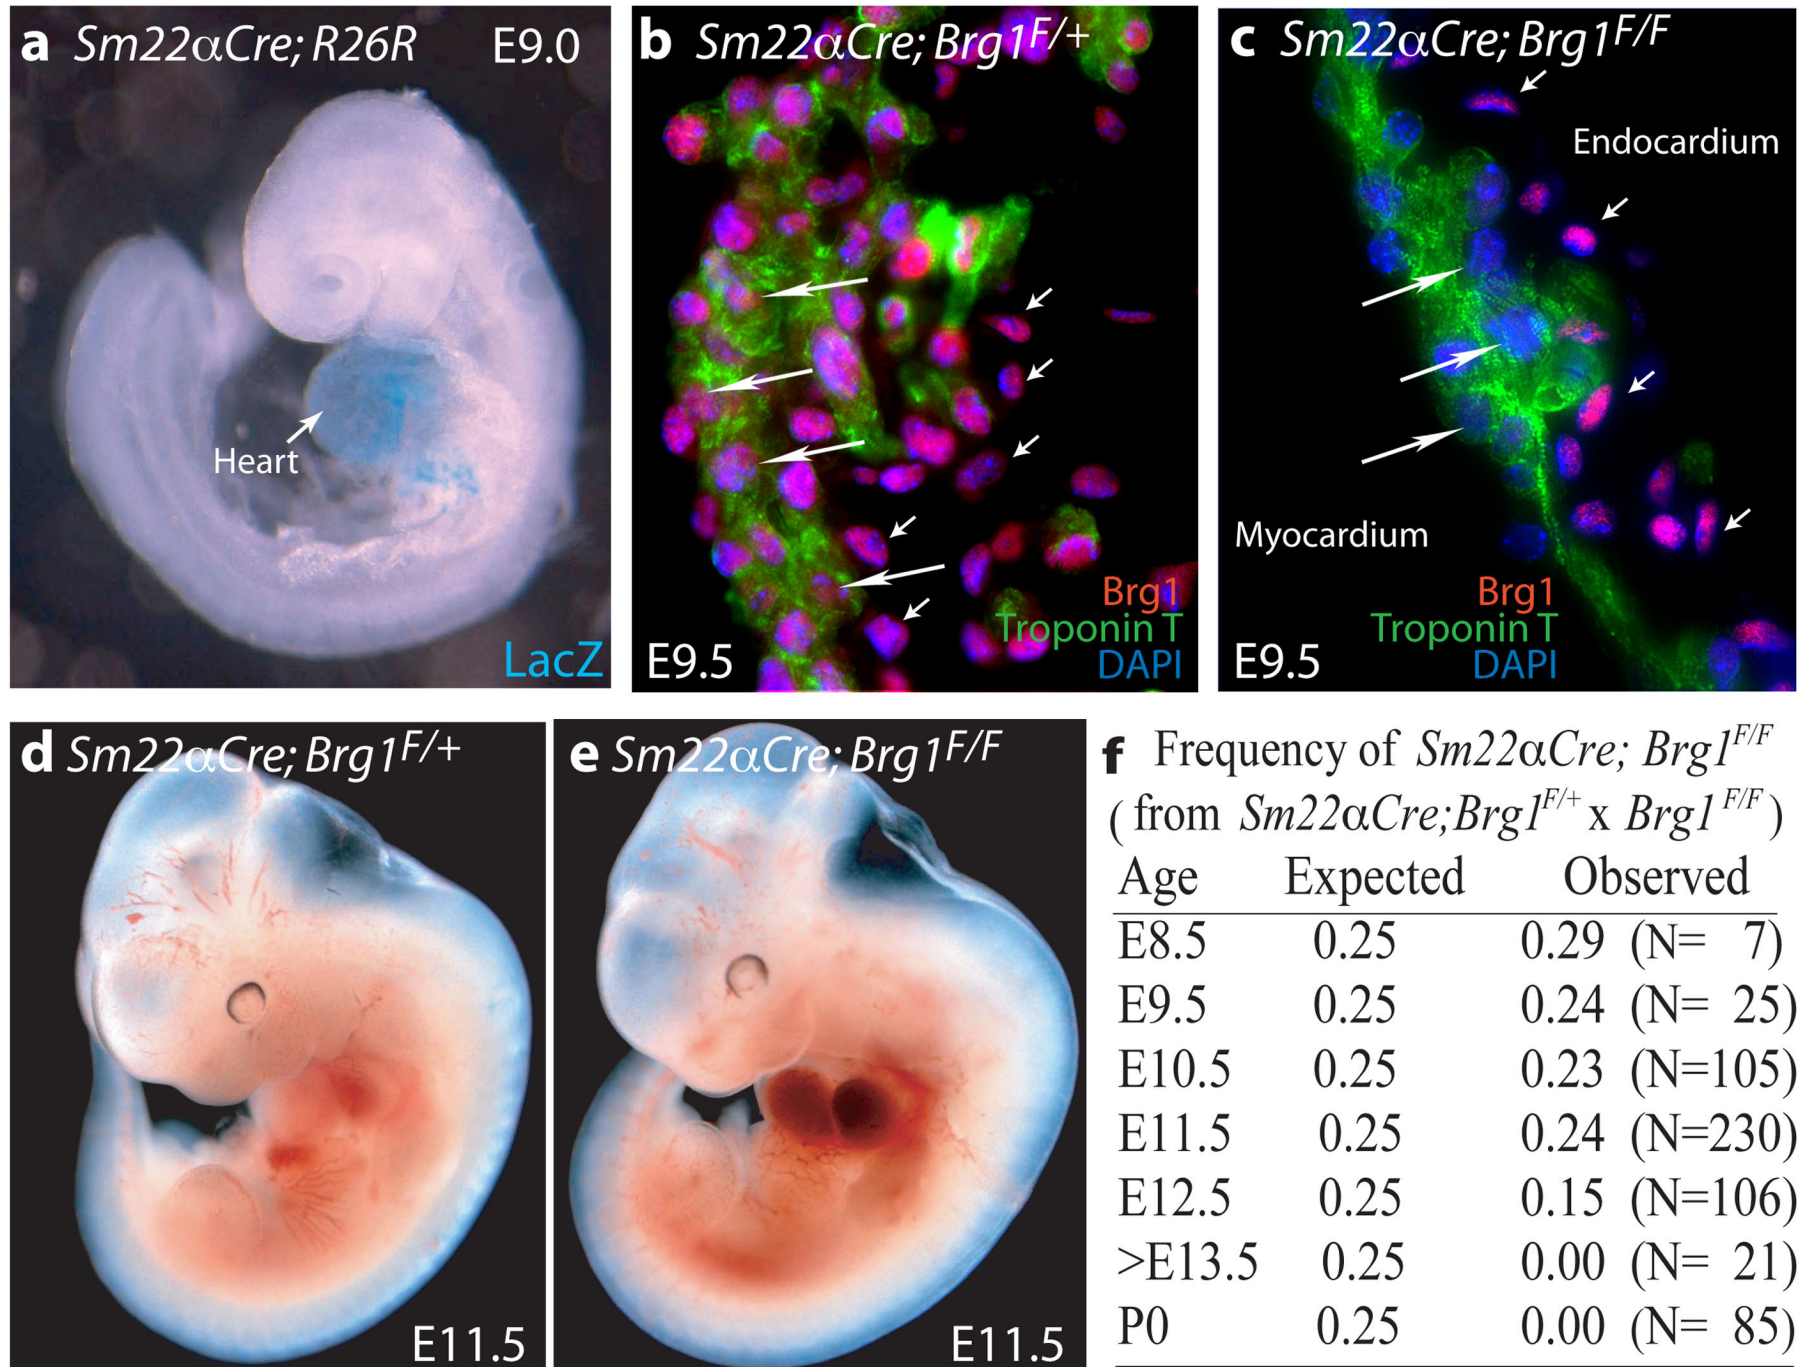

*Sm22αCre; Brg1<sup>F/F</sup>* embryonic myocardium fails to proliferate

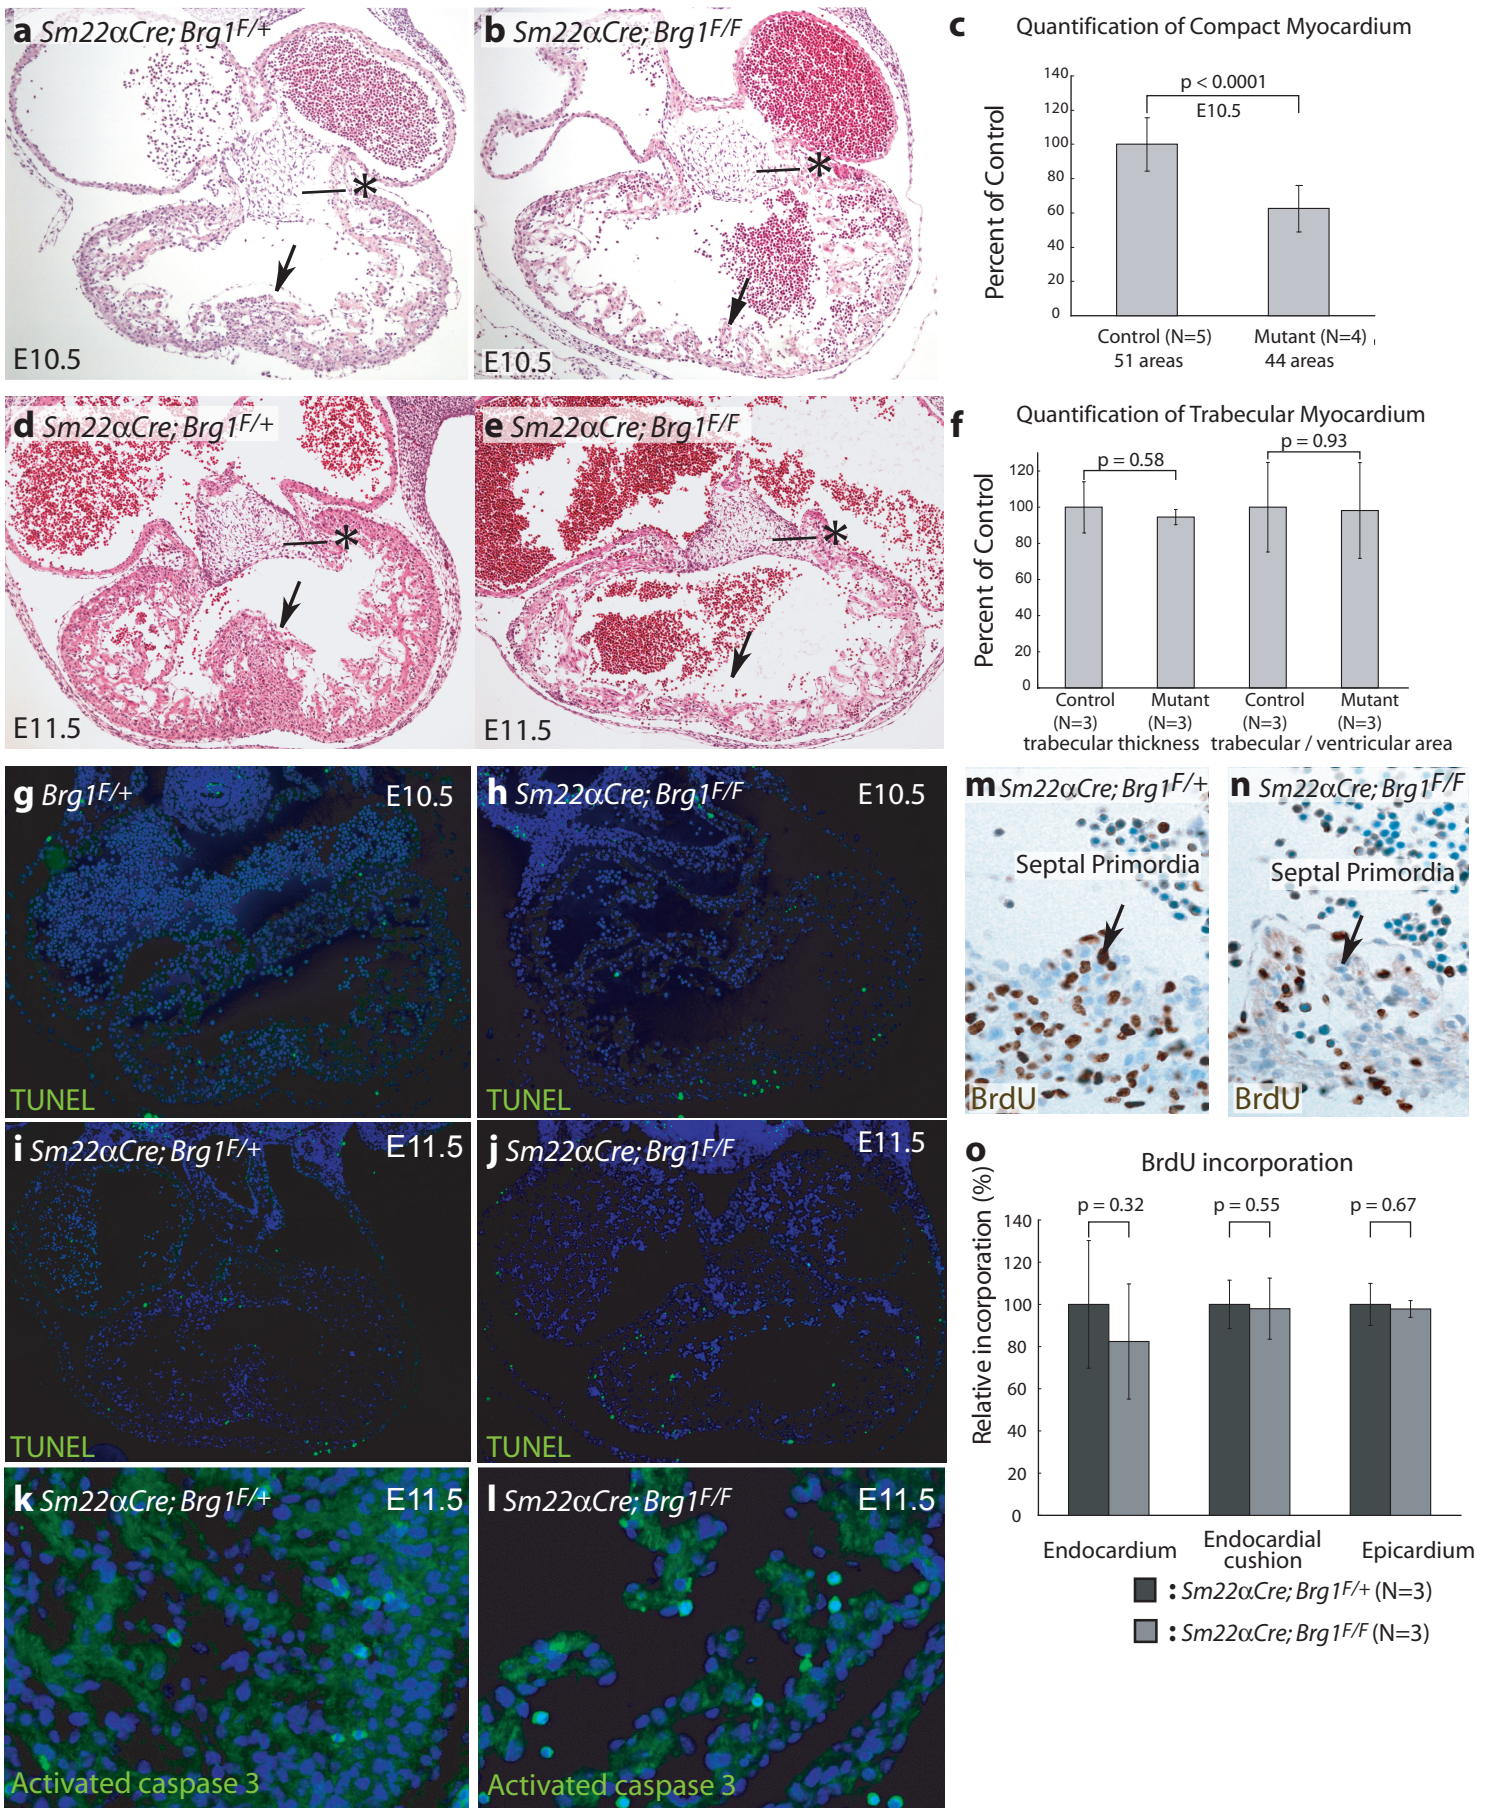

*Sm22 $\alpha$ Cre; Brg1<sup>F/F</sup>* embryos have normal cardiac jelly and vascular pattern at E11.5

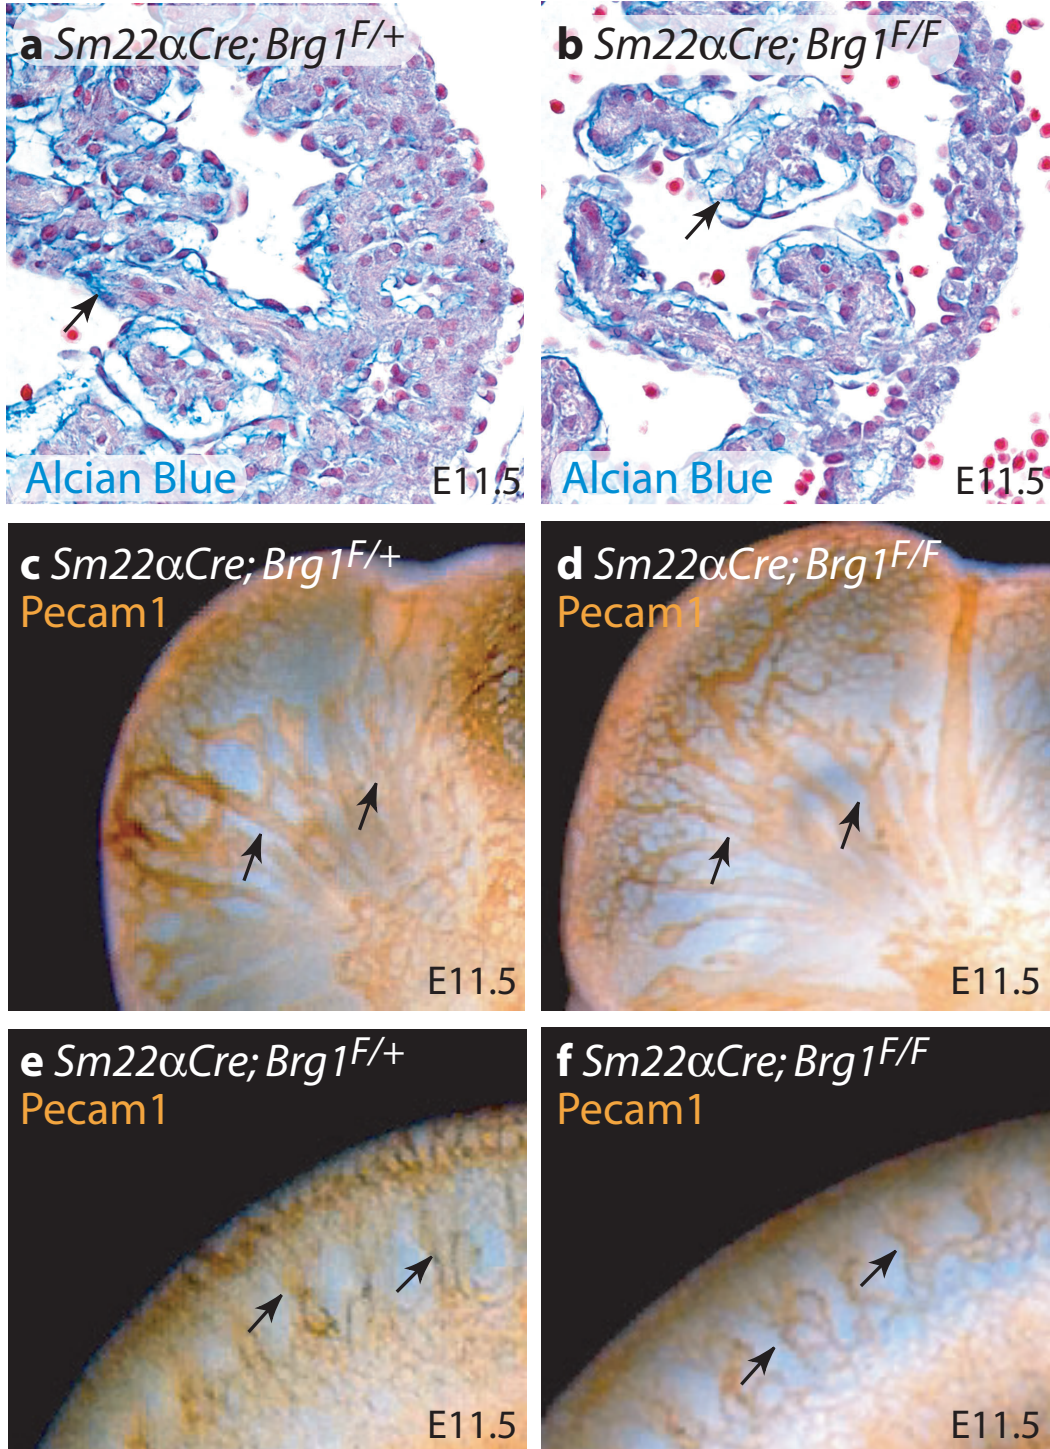

*Sm22 $\alpha$ Cre; Brg1<sup>F/F</sup>* embryos have normal expression of many cardiac genes

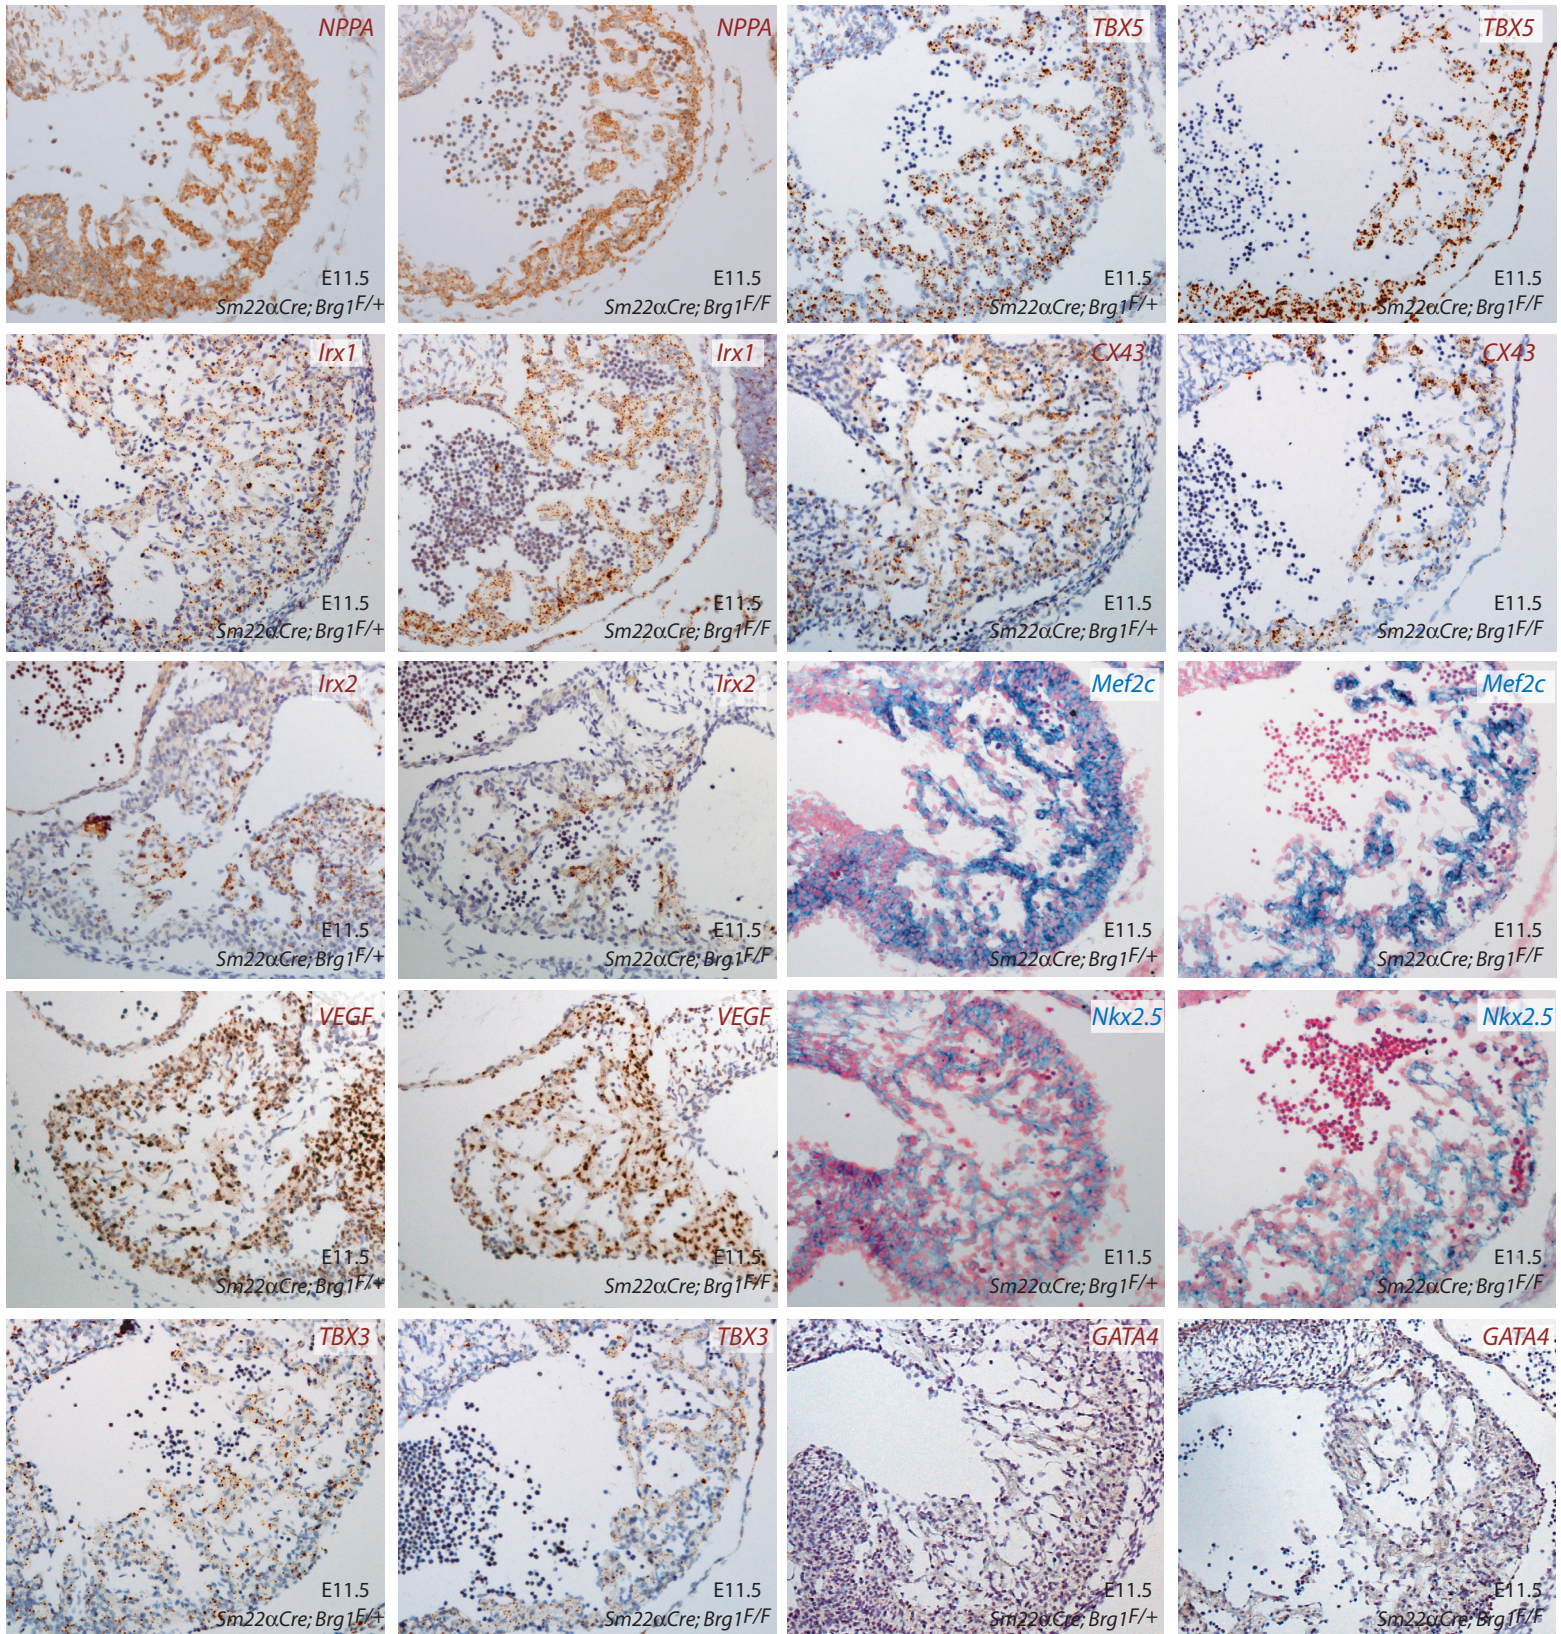

*Sm22αCre; Brg1<sup>F/F</sup>* mutants have ectopic expression of p57kip2

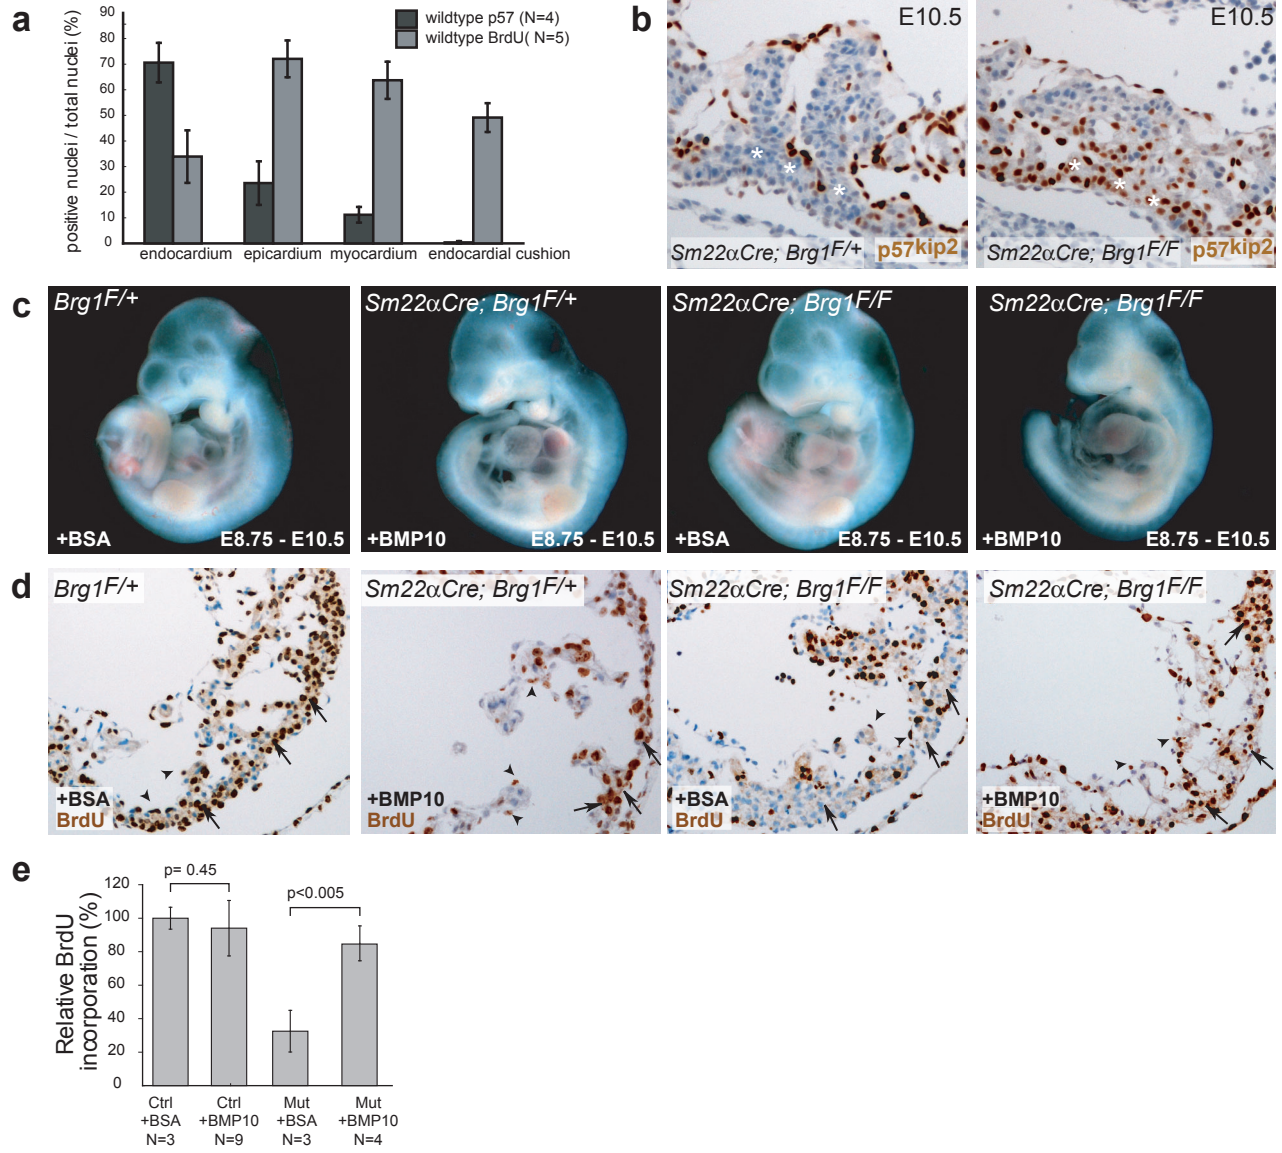



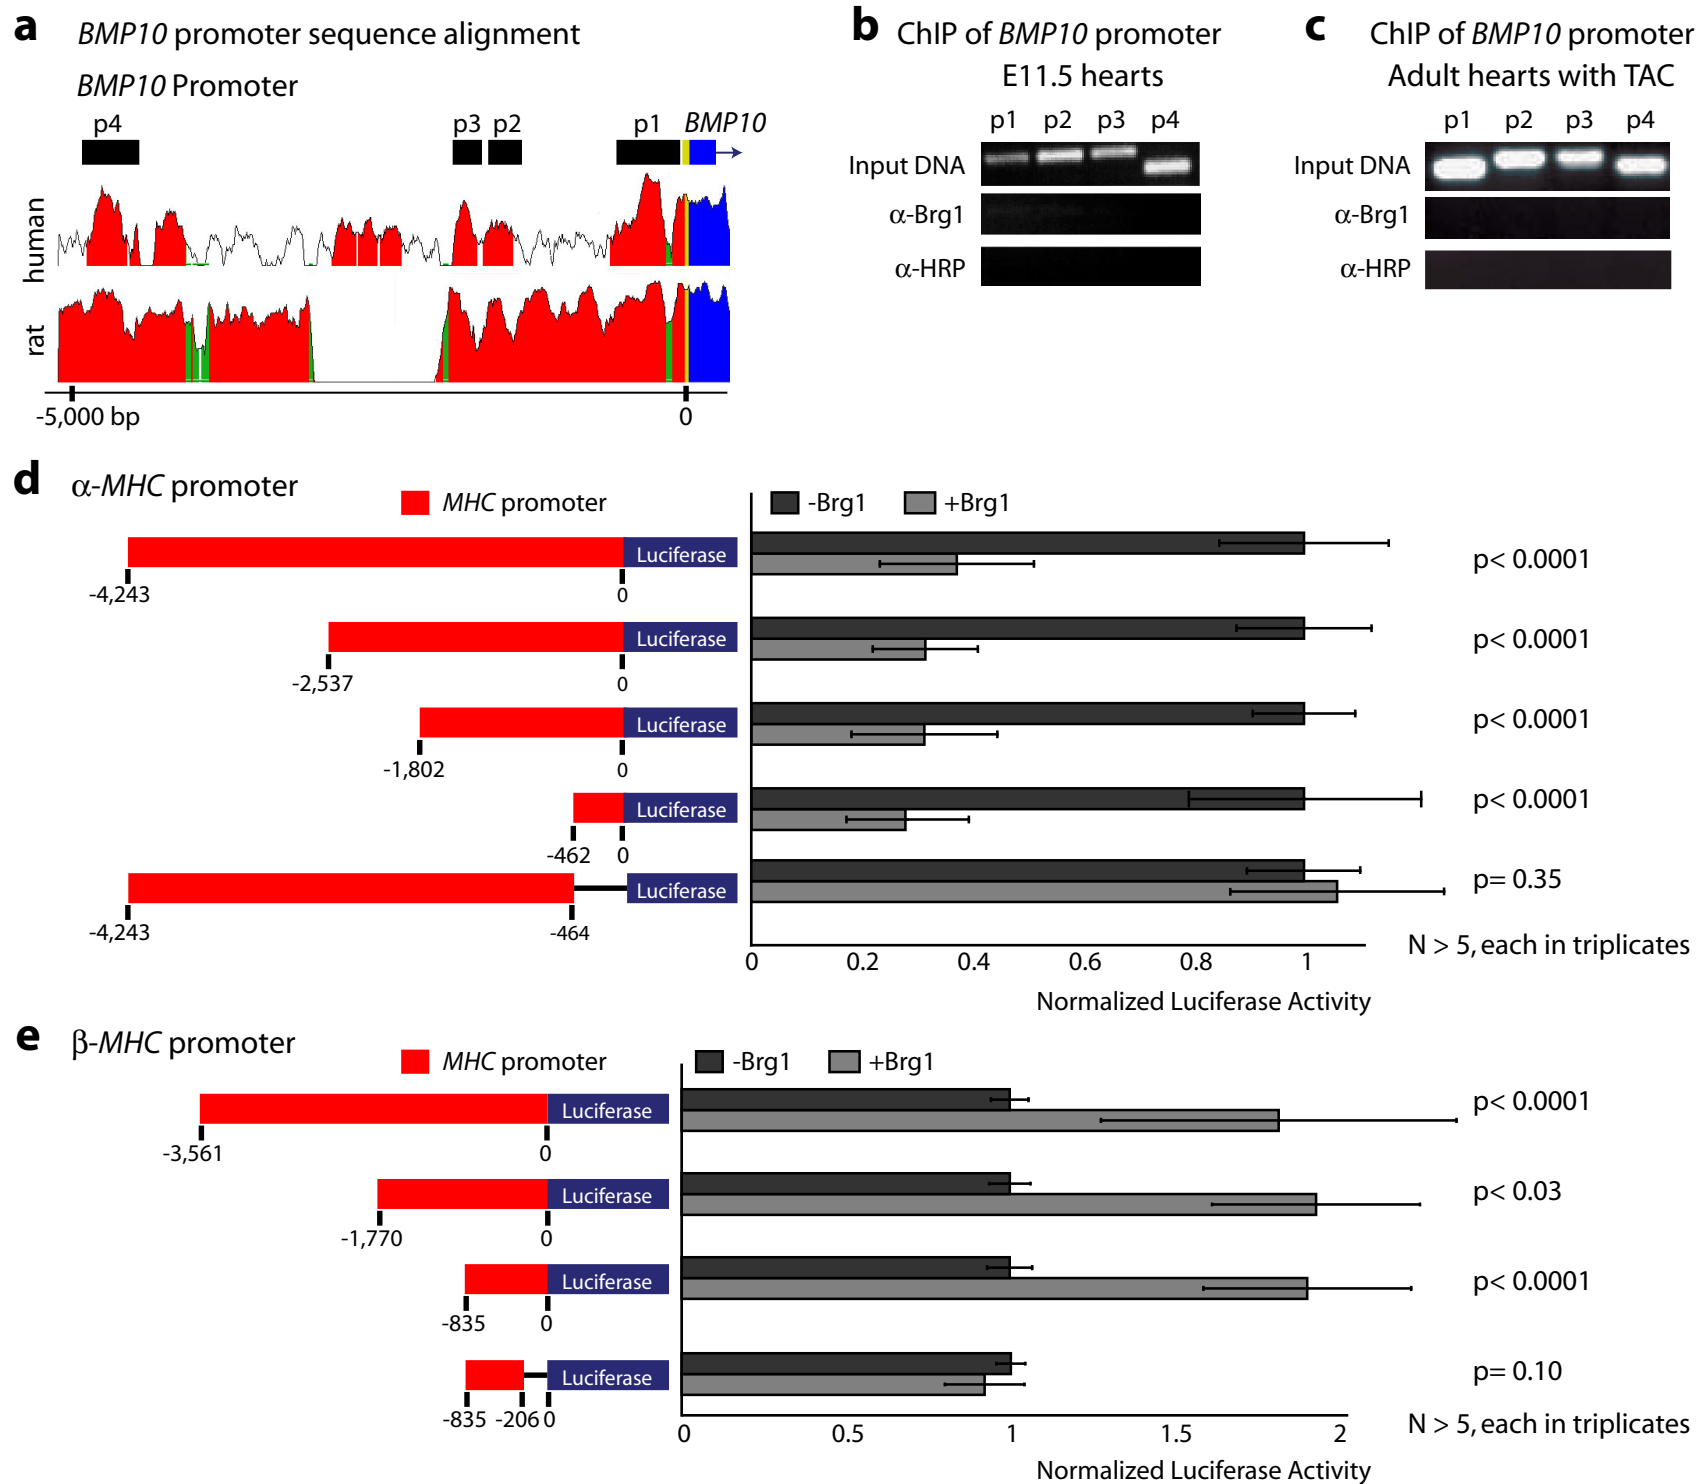



Brg1 commands parallel pathways to regulate myocardial proliferation and differentiation

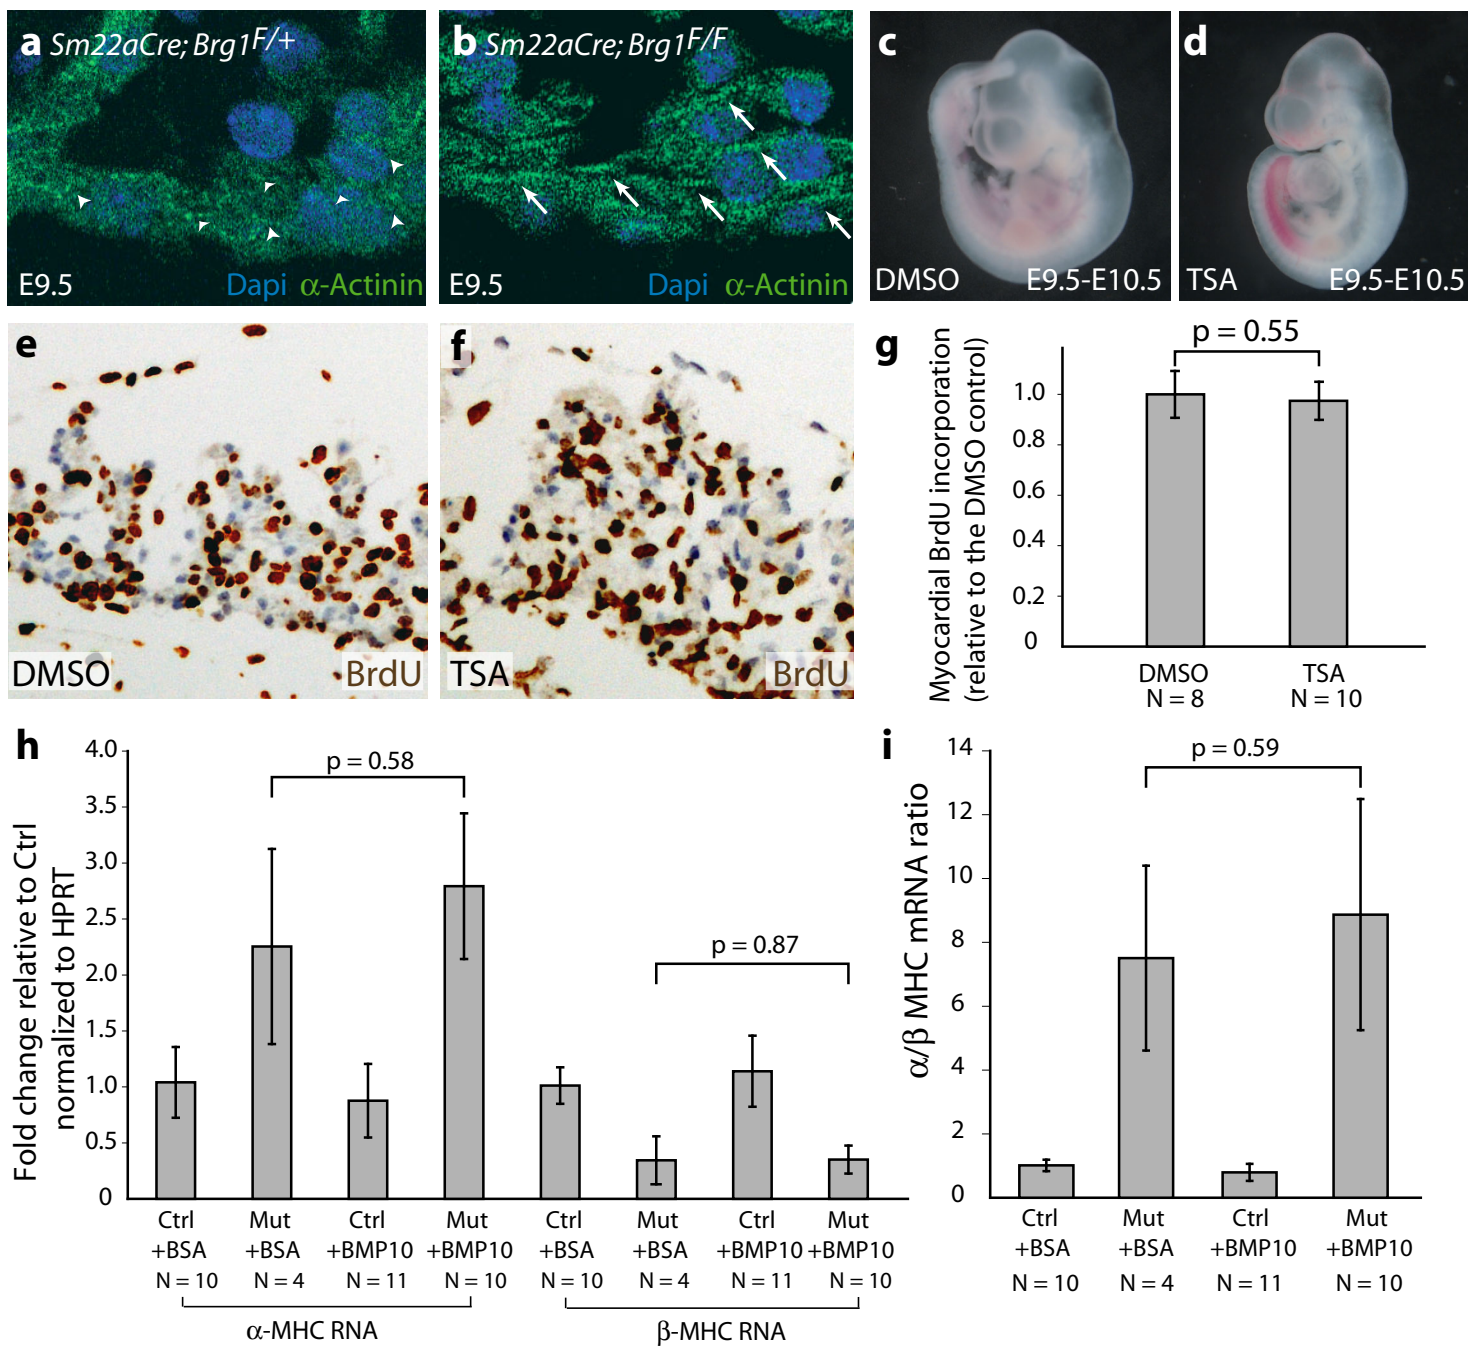



PARP1 ChIP analysis, expression and co-IP with HDAC

**a** ChIP of *BMP10* promoter

Adult hearts with TAC

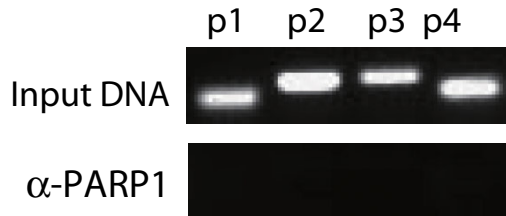

**c** ChIP of *BMP10* promoter

E11.5 hearts

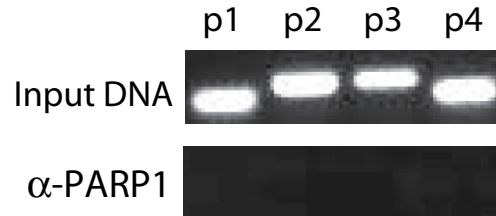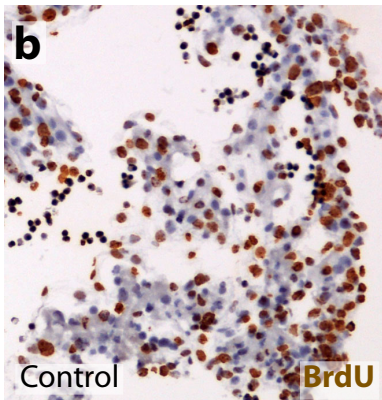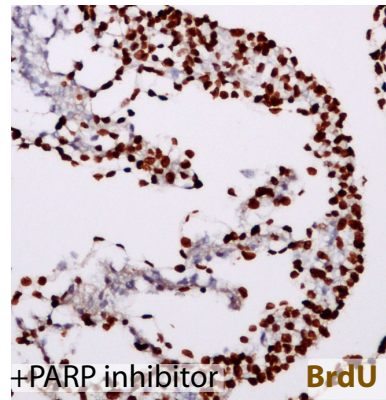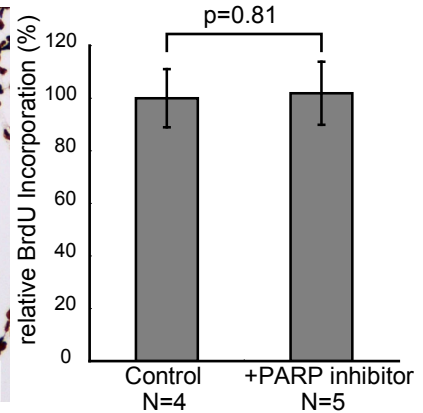

**d** E11.5 myocardium

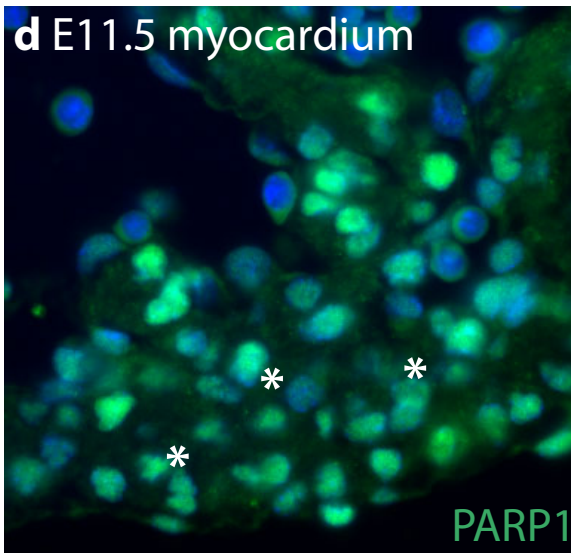

**e** PARP1 and HDAC co-immunoprecipitation

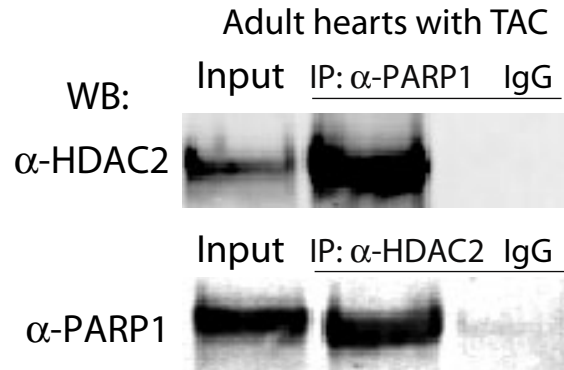

**f** ChIP analysis of HDAC9 binding

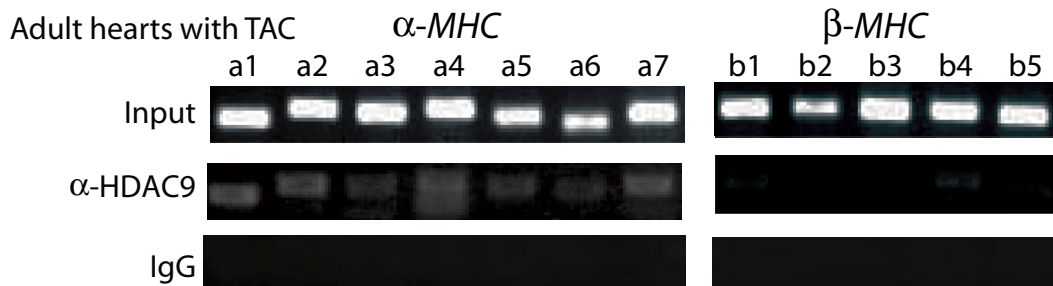

**a** Control individuals with normal hearts

| Age | Gender | Diagnosis                        | IVSd (cm) |
|-----|--------|----------------------------------|-----------|
| 38  | M      | Normal relative of a HCM patient | 0.96      |
| 42  | F      | Normal relative of a HCM patient | 0.88      |
| 44  | M      | Normal relative of a HCM patient | 0.83      |
| 49  | M      | Normal relative of a HCM patient | 1.1       |
| 20  | M      | Normal athlete                   | 1.0       |
| 31  | M      | Heart transplant donor           | 1.1       |

## Patients with hypertrophic cardiomyopathy (HCM)

| Age | Gender | Diagnosis | Tissue Source         | IVSd (cm) |
|-----|--------|-----------|-----------------------|-----------|
| 38  | F      | HCM       | Surgical myectomy     | 2.5       |
| 48  | M      | HCM       | Surgical myectomy     | 2.1       |
| 39  | M      | HCM       | Heart transplantation | 1.7       |
| 35  | M      | HCM       | Surgical myectomy     | 1.6       |

**b** Cardiac MRI
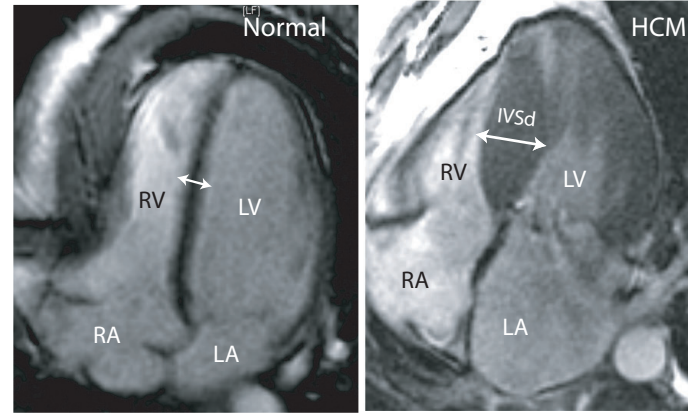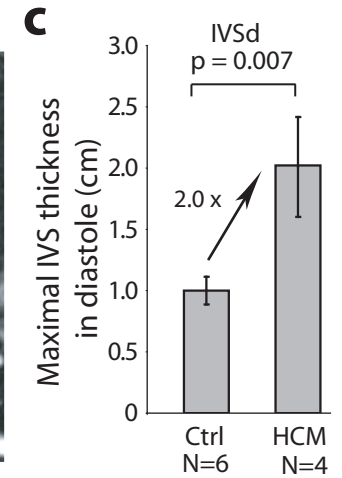
**d** Derivation of the inflection point for Fig. 5b

$$y = a + b \cdot [1 + e^{(c-dx)}]^{-1}, a = 0.94, b = 1.2, c = 30, d = 20$$

$$\frac{dy}{dx} = bd \cdot [e^{(c-dx)}] \cdot [1 + e^{(c-dx)}]^{-2}$$

$$\frac{d}{dx} \left( \frac{dy}{dx} \right) = (bd^2) \cdot [e^{(c-dx)}] \cdot \{ [1 + e^{(c-dx)}]^{-2} \} \cdot \{ 2 \cdot [e^{(c-dx)}] \cdot [1 + e^{(c-dx)}]^{-1} - 1 \}$$

$$\therefore \text{Inflection point } (x, y) \text{ occurs when } \frac{d}{dx} \left( \frac{dy}{dx} \right) = 0$$

$$\therefore bd^2 \cdot [e^{(c-dx)}] \cdot \{ [1 + e^{(c-dx)}]^{-2} \} \cdot \{ 2 \cdot [e^{(c-dx)}] \cdot [1 + e^{(c-dx)}]^{-1} - 1 \} = 0$$

for inflection at  $(x, y)$

$$\text{Since } e^{(c-dx)}, [1 + e^{(c-dx)}] > 0,$$

$$\therefore 2 \cdot [e^{(c-dx)}] \cdot [1 + e^{(c-dx)}]^{-1} - 1 = 0$$

$$\therefore e^{(c-dx)} = 1 \quad \therefore c - dx = 0$$

$$\therefore x = c/d = 30/20 = 1.50, y = a + b \cdot (1 + e^0)^{-1} = 0.94 + 1.2/2 = 1.54$$

$$\therefore \text{Inflection point } (x, y) = (1.50, 1.54)$$

**e** Derivation of the inflection point for Fig. 5c

$$y = a \cdot e^{-e^{(b-cx)}}, a = 150, b = 160, c = 110$$

$$\frac{dy}{dx} = ac \cdot [e^{-e^{(b-cx)}}] \cdot [e^{(b-cx)}]$$

$$\frac{d}{dx} \left( \frac{dy}{dx} \right) = ac^2 \cdot [e^{-e^{(b-cx)}}] \cdot [e^{(b-cx)}] \cdot [1 - e^{(b-cx)}]$$

$$\therefore \text{Inflection point } (x, y) \text{ occurs when } \frac{d}{dx} \left( \frac{dy}{dx} \right) = 0$$

$$\therefore ac^2 \cdot [e^{-e^{(b-cx)}}] \cdot [e^{(b-cx)}] \cdot [1 - e^{(b-cx)}] = 0 \text{ for inflection point } (x, y)$$

$$\text{Since } e^{-e^{(b-cx)}} > 0 \text{ and } e^{(b-cx)} > 0,$$

$$\therefore 1 - e^{(b-cx)} = 0$$

$$\therefore x = b/c = 160/110 = 1.45$$

$$\therefore y = a \cdot e^{-e^0} = 150 \cdot e^{-1} = 55.2$$

$$\therefore \text{Inflection point } (x, y) = (1.45, 55.2)$$
